# Supplementary material
Source: PubMed Central journal article supplement (PMC7749720)
Supplement: ofaa563_suppl_supplementary_materials_1.pdf [file ofaa563_suppl_supplementary_materials_1.pdf]

# **SUPPLEMENTARY MATERIALS**

**Supplementary Figure 1.** Internal guide for the management of patients with Covid-19 at Cisanello hospital.

| <b>Patient category</b> | <b>Clinical characteristics</b>                                                      | <b>Antiviral treatment</b>                                                                                      | <b>Other therapies</b> | <b>Immunosuppressant agents</b>                 |
|-------------------------|--------------------------------------------------------------------------------------|-----------------------------------------------------------------------------------------------------------------|------------------------|-------------------------------------------------|
| <b>LEVEL 1*</b>         | No evidence of pneumonia                                                             | Hydroxychloroquine ± macrolide OR LPV/r OR DRV/r                                                                | NO                     | NO                                              |
| <b>LEVEL 2</b>          | Radiological evidence of Pneumonia<br><br>PiO <sub>2</sub> /FiO <sub>2</sub> > 300   | Hydroxychloroquine ± macrolide OR LPV/r OR DRV/r                                                                | Consider LMWH          | NO                                              |
| <b>LEVEL 3</b>          | Radiological evidence of Pneumonia<br><br>PiO <sub>2</sub> /FiO <sub>2</sub> 200-300 | Hydroxychloroquine ± macrolide OR LPV/r OR DRV/r                                                                | Consider LMWH          | Consider: Tocilizumab OR Baricitinib ± Steroids |
| <b>LEVEL 4</b>          | Radiological evidence of Pneumonia<br><br>PiO <sub>2</sub> /FiO <sub>2</sub> <200    | Hydroxychloroquine ± macrolide OR LPV/r OR DRV/r<br><br>If invasive ventilation: Remdesivir (compassionate use) | Consider LMWH          | Consider: Tocilizumab OR Baricitinib ± Steroids |

\* Patients of Level 1 were discharged and managed at home

LPV/r: lopinavir/ritonavir; DRV/r: darunavir/ritonavir; LMWH: low-molecular weight heparin

**Supplementary Table 1.** Logistic regression analysis evaluating the association between interventions and 30-day mortality.

| <b>Intervention</b>                       | <b>OR (95% CI)</b> | <b>P-Value</b> |
|-------------------------------------------|--------------------|----------------|
| Medications during hospital course, n (%) |                    |                |
| Doxycycline                               | 0.72 (0.36-1.41)   | 0.333          |
| Macrolides                                | 0.22 (0.06-0.8)    | <b>0.021</b>   |
| Proteases inhibitors (LPV/r or DRV/r)     | 0.58 (0.28-1.17)   | 0.128          |
| Remdesivir                                | 0.32 (0.04-2.8)    | 0.304          |
| Hydroxychloroquine                        | 0.82 (0.38-1.8)    | 0.625          |
| Steroids                                  | 1.07 (0.57-2.0)    | 0.838          |
| Low-molecular-weight heparin              | 0.33 (0.17-0.66)   | <b>0.002</b>   |
| Immunosuppressants, n (%)                 |                    |                |
| Tocilizumab                               | 0.7 (0.14-3.57)    | 0.671          |
| Baricitinib                               | 0.68 (0.22-2.13)   | 0.512          |
| Other Interventions, n (%)                |                    |                |
| Non-invasive ventilation                  | 1.44 (0.65-3.17)   | 0.371          |

**Supplementary Table 2.** Logistic regression analysis evaluating the association between interventions and the composite endpoint of death or severe ARDS.

| <b>Intervention</b>                       | <b>OR (95% CI)</b> | <b>P-Value</b> |
|-------------------------------------------|--------------------|----------------|
| Medications during hospital course, n (%) |                    |                |
| Doxycycline                               | 1.11 (0.62-1.97)   | 0.733          |
| Macrolides                                | 0.46 (0.2-1.06)    | 0.068          |
| Proteases inhibitors (LPV/r or DRV/r)     | 0.73 (0.39-1.35)   | 0.323          |
| Remdesivir                                | 0.71 (0.21-2.47)   | 0.593          |
| Hydroxychloroquine                        | 0.9 (0.44-1.86)    | 0.780          |
| Steroids                                  | 2.62 (1.52-4.51)   | <b>0.001</b>   |
| Low-molecular-weight heparin              | 0.37 (0.19-0.72)   | <b>0.003</b>   |
| Immunosuppressants, n (%)                 |                    |                |
| Tocilizumab                               | 2.19 (0.66-7.32)   | 0.202          |
| Baricitinib                               | 2.04 (0.91-4.55)   | 0.083          |
| Other Interventions, n (%)                |                    |                |
| Non-invasive ventilation                  | 2.14 (1.12-4.09)   | <b>0.022</b>   |

**Supplementary Table 3.** Comparison of matched patients who received or not LMWH.

| Variable                                              | LMWH<br>N=55    | Controls<br>N=55 | p value |
|-------------------------------------------------------|-----------------|------------------|---------|
| Age, years, median (IQR)                              | 68 (57-79)      | 69 (55-81)       | 0.342   |
| Male sex, n (%)                                       | 38 (69.1)       | 45 (81.8)        | 0.121   |
| Coexisting comorbidities, n (%)                       |                 |                  |         |
| COPD                                                  | 5 (9.1)         | 12 (21.8)        | 0.065   |
| Arterial hypertension                                 | 23 (41.8)       | 33 (60)          | 0.056   |
| Cardiovascular disease                                | 20 (36.4)       | 16 (29.1)        | 0.416   |
| Diabetes mellitus                                     | 11 (20)         | 9 (16.4)         | 0.621   |
| Cerebrovascular disease                               | 6 (10.9)        | 10 (18.2)        | 0.279   |
| Haemodialysis                                         | 1 (1.8)         | 1 (1.8)          | 1.0     |
| Solid cancer                                          | 8 (14.5)        | 3 (5.5)          | 0.112   |
| Chronic kidney disease                                | 3 (5.5)         | 9 (16.4)         | 0.067   |
| Charlson Comorbidity Index, median (IQR)              | 2 (1-5)         | 3 (1-5)          | 0.371   |
| SOFA score on admission, median (IQR)                 | 2 (1-3)         | 3 (1-4)          | 0.092   |
| Vital signs on admission, n (%)                       |                 |                  |         |
| Systolic blood pressure < 90 mmHg                     | 2 (3.6)         | 5 (9.1)          | 0.241   |
| Heart rate > 110 bpm                                  | 7 (12.7)        | 7 (12.7)         | 1.0     |
| Respiratory rate > 24 bpm                             | 14 (25.5)       | 16 (29.1)        | 0.669   |
| PaO <sub>2</sub> /FiO <sub>2</sub> ratio < 300        | 30 (54.5)       | 31 (56.4)        | 0.848   |
| Laboratory findings on admission <sup>a</sup> , n (%) |                 |                  |         |
| Glucose > 140 mg/dL                                   | 8 (14.5)        | 9 (16.4)         | 0.792   |
| Lymphopenia (L < 800/mcL)                             | 25 (45.5)       | 23 (41.8)        | 0.701   |
| Thrombocytopenia (< 150 < 10 <sup>3</sup> /mcL)       | 19 (35.8)       | 15 (27.3)        | 0.337   |
| Aspartate transaminase x 3 ULN                        | 1 (1.8)         | 7 (12.7)         | 0.028   |
| Alanine transaminase, x 3 ULN                         | 1 (1.8)         | 2 (3.)           | 0.558   |
| Creatinine > 1.5 mg/dL                                | 8 (14.5)        | 10 (18.2)        | 0.606   |
| D-dimer, mg/L, median (IQR)                           | 0.38 (0.2-0.76) | 0.47 (0.22-0.72) | 0.325   |
| High sensitivity troponin T, ng/L, median (IQR)       | 15 (7-32)       | 24 (5-56)        | 0.394   |
| Procalcitonin, ng/mL, median (IQR)                    | 0.12 (0.06-0.3) | 0.13 (0.08-0.3)  | 0.332   |
| C-reactive protein, mg/dl, median (IQR)               | 5.6 (2.7-12.1)  | 5.3 (2.7-10.5)   | 0.669   |
| Medications                                           |                 |                  |         |
| Doxycycline                                           | 30 (54.5)       | 28 (50.9)        | 0.702   |
| Macrolides                                            | 2 (3.6)         | 3 (5.5)          | 0.647   |
| Proteases inhibitors (LPV/r or DRV/r)                 | 37 (67.)        | 37 (67.3)        | 1.0     |
| Remdesivir                                            | 0               | 0                | -       |
| Hydroxychloroquine                                    | 39 (70.9)       | 42 (76.4)        | 0.516   |
| Steroids                                              | 15 (27.3)       | 19 (34.5)        | 0.409   |
| Baricitinib                                           | 1 (1.8)         | 1 (1.8)          | 1.0     |
| Tocilizumab                                           | 3 (5.5)         | 2 (3.6)          | 0.647   |
| Interventions                                         |                 |                  |         |
| Non-invasive mechanical ventilation, n (%)            | 9 (16.4)        | 11 (20)          | 0.621   |

COPD: chronic obstructive pulmonary disease; LMWH: low-molecular weight heparin; IQR: interquartile ranges; LPV/r: lopinavir/ritonavir; DRV/r: darunavir/ritonavir; ULN upper limit of normality

**Supplementary Table 4.** Comparison of matched patients who received or not hydroxychloroquine.

| Variable                                              | Hydroxychloroquine<br>N=20 | Controls<br>N=20 | p value |
|-------------------------------------------------------|----------------------------|------------------|---------|
| Age, years, median (IQR)                              | 65 (58-78.5)               | 73 (62.25-86)    | 0.462   |
| Male sex, n (%)                                       | 12 (60)                    | 11 (55)          | 0.749   |
| Coexisting comorbidities, n (%)                       |                            |                  |         |
| COPD                                                  | 0                          | 2 (10)           | 0.147   |
| Arterial hypertension                                 | 9 (45)                     | 15 (75)          | 0.053   |
| Cardiovascular disease                                | 6 (30)                     | 13 (65)          | 0.027   |
| Diabetes mellitus                                     | 4 (20)                     | 5 (25)           | 0.705   |
| Cerebrovascular disease                               | 4 (20)                     | 4 (20)           | 1.0     |
| Haemodialysis                                         | 0                          | 2 (10)           | 0.147   |
| Solid cancer                                          | 7 (35)                     | 6 (30)           | 0.736   |
| Chronic kidney disease                                | 0                          | 2 (10)           | 0.147   |
| Charlson Comorbidity Index, median (IQR)              | 3 (1-5)                    | 3 (3-5)          | 0.486   |
| SOFA score on admission, median (IQR)                 | 2 (1-3)                    | 3 (2-4.5)        | 0.059   |
| Vital signs on admission, n (%)                       |                            |                  |         |
| Systolic blood pressure < 90 mmHg                     | 0                          | 2 (10)           | 0.147   |
| Heart rate > 110 bpm                                  | 1 (5)                      | 2 (10)           | 0.548   |
| Respiratory rate > 22 bpm                             | 5 (25)                     | 5 (25)           | 1.0     |
| PaO <sub>2</sub> /FiO <sub>2</sub> ratio < 300        | 10 (50)                    | 14 (70)          | 0.197   |
| Laboratory findings on admission <sup>a</sup> , n (%) |                            |                  |         |
| Glucose > 140 mg/dL                                   | 8 (40)                     | 6 (30)           | 0.507   |
| Lymphopenia (L < 800/mcL)                             | 12 (60)                    | 12 (60)          | 1.0     |
| Thrombocytopenia (< 150 < 10 <sup>3</sup> /mcL)       | 8 (42.1)                   | 11 (55)          | 0.421   |
| Aspartate transaminase x 3 ULN                        | 1 (5)                      | 2 (10)           | 0.548   |
| Alanine transaminase, x 3 ULN                         | 0                          | 2 (10)           | 0.147   |
| Creatinine > 1.5 mg/dL                                | 1 (5)                      | 2 (10)           | 0.548   |
| D-dimer, mg/L, median (IQR)                           | 0.37 (0.16-0.56)           | 0.38 (0.2-0.74)  | 0.862   |
| High sensitivity troponin T, ng/L, median (IQR)       | 15.5 (6.2-30)              | 19 (12.7-39)     | 0.122   |
| Procalcitonin, ng/mL, median (IQR)                    | 0.16 (0.06-0.48)           | 0.15 (0.05-0.25) | 0.440   |
| C-reactive protein, mg/dl, median (IQR)               | 4 (0.7-13.7)               | 9.4 (0.4-14.2)   | 0.179   |
| Medications                                           |                            |                  |         |
| Doxycycline                                           | 9 (45)                     | 12 (60)          | 0.342   |
| Macrolides                                            | 1 (5)                      | 1 (5)            | 1.0     |
| Proteases inhibitors (LPV/r or DRV/r)                 | 13 (65)                    | 9 (45)           | 0.204   |
| Remdesivir                                            | 0                          | 1 (5)            | 0.311   |
| LMWH                                                  | 16 (80)                    | 15 (75)          | 0.705   |
| Steroids                                              | 5 (25)                     | 10 (50)          | 0.102   |
| Baricitinib                                           | 2 (10)                     | 5 (25)           | 0.212   |
| Tocilizumab                                           | 3 (15)                     | 1 (5)            | 0.292   |
| Interventions                                         |                            |                  |         |
| Non-invasive mechanical ventilation, n (%)            | 3 (15)                     | 6 (30)           | 0.256   |

COPD: chronic obstructive pulmonary disease; LMWH: low-molecular weight heparin; IQR: interquartile ranges; LPV/r: lopinavir/ritonavir; DRV/r: darunavir/ritonavir; ULN upper limit of normality

**Supplementary Table 5.** Comparison of matched patients who received or not macrolides.

| Variable                                              | Macrolides<br>N=31 | Controls<br>N=31 | p value |
|-------------------------------------------------------|--------------------|------------------|---------|
| Age, years, median (IQR)                              | 67 (57-78)         | 68 (58-76)       | 0.932   |
| Male sex, n (%)                                       | 21 (67.7)          | 25 (80.6)        | 0.384   |
| Coexisting comorbidities, n (%)                       |                    |                  |         |
| COPD                                                  | 3 (9.7)            | 2 (6.5)          | 1.0     |
| Arterial hypertension                                 | 19 (61.3)          | 16 (51.6)        | 0.609   |
| Cardiovascular disease                                | 8 (25.8)           | 7 (22.6)         | 1.0     |
| Diabetes mellitus                                     | 14 (45.2)          | 7 (22.6)         | 0.106   |
| Cerebrovascular disease                               | 2 (6.5)            | 3 (9.7)          | 1.0     |
| Haemodialysis                                         | 1 (3.2)            | 0                | 1.0     |
| Solid cancer                                          | 4 (12.9)           | 4 (12.9)         | 1.0     |
| Chronic kidney disease                                | 2 (6.5)            | 1 (3.2)          | 1.0     |
| Charlson Comorbidity Index, median (IQR)              | 3 (1-4)            | 3 (0.5-4)        | 0.91    |
| SOFA score on admission, median (IQR)                 | 2 (1-2)            | 2 (1-3)          | 0.846   |
| Vital signs on admission, n (%)                       |                    |                  |         |
| Systolic blood pressure < 90 mmHg                     | 5 (16.1)           | 1 (3.2)          | 0.098   |
| Heart rate > 110 bpm                                  | 6 (19.4)           | 2 (6.5)          | 0.255   |
| Respiratory rate > 22 bpm                             | 3 (9.7)            | 10 (32.3)        | 0.059   |
| PaO <sub>2</sub> /FiO <sub>2</sub> ratio < 300        | 14 (45.2)          | 12 (38.7)        | 0.797   |
| Laboratory findings on admission <sup>a</sup> , n (%) |                    |                  |         |
| Glucose > 140 mg/dL                                   | 10 (32.3)          | 5 (16.1)         | 0.235   |
| Lymphopenia (L < 800/mcL)                             | 10 (32.3)          | 14 (45.2)        | 0.434   |
| Thrombocytopenia (< 150 < 10 <sup>3</sup> /mcL)       | 8 (25.8)           | 9 (30)           | 0.78    |
| Aspartate transaminase x 3 ULN                        | 0                  | 0                | -       |
| Alanine transaminase, x 3 ULN                         | 0                  | 3 (9.7)          | 0.238   |
| Creatinine > 1.5 mg/dL                                | 1 (3.2)            | 0                | 1.0     |
| D-dimer, mg/L, median (IQR)                           | 0.55 (0.32-0.76)   | 0.41 (0.26-0.9)  | 0.396   |
| High sensitivity troponin T, ng/L, median (IQR)       | 16 (9-24)          | 17 (6-39)        | 0.279   |
| Procalcitonin, ng/mL, median (IQR)                    | 0.08 (0.05-0.12)   | 0.08 (0.06-0.2)  | 0.389   |
| C-reactive protein, mg/dl, median (IQR)               | 8.8 (1.81-10.6)    | 6.2 (1.2-14)     | 0.62    |
| Medications                                           |                    |                  |         |
| Doxycycline                                           | 15 (48.4)          | 16 (51.6)        | 1.0     |
| Proteases inhibitors (LPV/r or DRV/r)                 | 22 (71)            | 21 (67.7)        | 1.0     |
| Remdesivir                                            | 1 (3.2)            | 3 (9.7)          | 0.612   |
| Hydroxychloroquine                                    | 26 (83.9)          | 27 (87.1)        | 1.0     |
| LMWH                                                  | 28 (90.3)          | 30 (96.8)        | 0.612   |
| Steroids                                              | 19 (61.3)          | 12 (38.7)        | 0.127   |
| Baricitinib                                           | 7 (22.6)           | 2 (6.5)          | 0.147   |
| Tocilizumab                                           | 31 (100)           | 31 (100)         | -       |
| Interventions                                         |                    |                  |         |
| Non-invasive mechanical ventilation, n (%)            | 6 (19.4)           | 4 (12.9)         | 0.731   |

COPD: chronic obstructive pulmonary disease; LMWH: low-molecular weight heparin; IQR: interquartile ranges;

LPV/r: lopinavir/ritonavir; DRV/r: darunavir/ritonavir; ULN upper limit of normality

**Supplementary Table 6.** Comparison of matched patients who received or not doxycycline.

| Variable                                              | Doxycycline<br>N=74 | Controls<br>N=74  | p value |
|-------------------------------------------------------|---------------------|-------------------|---------|
| Age, years, median (IQR)                              | 60 (55-78)          | 64 (51-78)        | 0.209   |
| Male sex, n (%)                                       | 52 (70.3)           | 45 (60.8)         | 0.299   |
| Coexisting comorbidities, n (%)                       |                     |                   |         |
| COPD                                                  | 7 (9.5)             | 3 (4.1)           | 0.327   |
| Arterial hypertension                                 | 33 (44.6)           | 24 (32.4)         | 0.176   |
| Cardiovascular disease                                | 22 (29.7)           | 12 (16.2)         | 0.078   |
| Diabetes mellitus                                     | 14 (18.9)           | 8 (10.8)          | 0.248   |
| Cerebrovascular disease                               | 7 (9.5)             | 12 (16.2)         | 0.326   |
| Haemodialysis                                         | 0                   | 2 (2.7)           | 0.497   |
| Solid cancer                                          | 10 (13.5)           | 9 (12.2)          | 1.0     |
| Chronic kidney disease                                | 5 (6.8)             | 7 (9.5)           | 0.765   |
| Charlson Comorbidity Index, median (IQR)              | 3 (1-4)             | 2 (0-5)           | 0.96    |
| SOFA score on admission, median (IQR)                 | 2 (1-3)             | 2 (1-4)           | 0.875   |
| Vital signs on admission, n (%)                       |                     |                   |         |
| Systolic blood pressure < 90 mmHg                     | 3 (4.1)             | 8 (10.8)          | 0.209   |
| Heart rate > 110 bpm                                  | 9 (12.2)            | 5 (6.8)           | 0.4     |
| Respiratory rate > 22 bpm                             | 20 (27)             | 18 (24.3)         | 0.851   |
| PaO <sub>2</sub> /FiO <sub>2</sub> ratio < 300        | 43 (58.1)           | 38 (51.4)         | 0.509   |
| Laboratory findings on admission <sup>a</sup> , n (%) |                     |                   |         |
| Glucose > 140 mg/dL                                   | 10 (13.5)           | 23 (31.1)         | 0.017   |
| Lymphopenia (L < 800/mcL)                             | 30 (40.5)           | 27 (36.5)         | 0.736   |
| Thrombocytopenia (< 150 < 10 <sup>3</sup> /mcL)       | 21 (28.8)           | 20 (27)           | 0.853   |
| Aspartate transaminase x 3 ULN                        | 7 (9.5)             | 1 (1.4)           | 0.063   |
| Alanine transaminase, x 3 ULN                         | 4 (5.4)             | 3 (4.1)           | 1.0     |
| Creatinine > 1.5 mg/dL                                | 2 (2.7)             | 6 (8.1)           | 0.275   |
| D-dimer, mg/L, median (IQR)                           | 0.34 (0.2-0.67)     | 0.64 (0.35-1)     | 0.78    |
| High sensitivity troponin T, ng/L, median (IQR)       | 11 (6-39)           | 15 (6-21)         | 0.098   |
| Procalcitonin, ng/mL, median (IQR)                    | 0.1 (0.57-0.16)     | 0.13 (0.06-0.56)  | 0.318   |
| C-reactive protein, mg/dl, median (IQR)               | 4.82 (1.5-12.01)    | 3.88 (2.12-15.01) | 0.721   |
| Medications, n (%)                                    |                     |                   |         |
| Macrolides                                            | 5 (6.8)             | 2 (2.7)           | 0.442   |
| Proteases inhibitors (LPV/r or DRV/r)                 | 63 (85.1)           | 62 (83.8)         | 1.0     |
| Remdesivir                                            | 0                   | 1 (1.4)           | 1.0     |
| Hydroxychloroquine                                    | 65 (87.8)           | 65 (87.8)         | 1.0     |
| LMWH                                                  | 61 (82.4)           | 59 (79.7)         | 0.834   |
| Steroids                                              | 28 (37.8)           | 28 (37.8)         | 1.0     |
| Baricitinib                                           | 10 (13.5)           | 6 (8.1)           | 0.428   |
| Tocilizumab                                           | 1 (1.4)             | 2 (2.7)           | 1.0     |
| Interventions                                         |                     |                   |         |
| Non-invasive mechanical ventilation, n (%)            | 14 (18.9)           | 11 (14.9)         | 0.661   |

COPD: chronic obstructive pulmonary disease; LMWH: low-molecular weight heparin; IQR: interquartile ranges; LPV/r: lopinavir/ritonavir; DRV/r: darunavir/ritonavir; ULN upper limit of normality



**Supplementary Table 7.** Comparison of matched patients who received or not proteases inhibitors

| Variable                                              | Proteases inhibitors<br>N=53 | Controls<br>N=53 | p value |
|-------------------------------------------------------|------------------------------|------------------|---------|
| Age, years, median (IQR)                              | 67 (57-80)                   | 73 (57-79)       | 0.72    |
| Male sex, n (%)                                       | 32 (60.4)                    | 33 (62.3)        | 1.0     |
| Coexisting comorbidities, n (%)                       |                              |                  |         |
| COPD                                                  | 4 (7.5)                      | 5 (9.4)          | 1.0     |
| Arterial hypertension                                 | 22 (41.5)                    | 23 (43.4)        | 1.0     |
| Cardiovascular disease                                | 11 (20.8)                    | 16 (30.2)        | 0.373   |
| Diabetes mellitus                                     | 10 (18.9)                    | 14 (26.4)        | 0.487   |
| Cerebrovascular disease                               | 5 (9.4)                      | 7 (13.2)         | 0.761   |
| Haemodialysis                                         | 0                            | 1 (1.9)          | 1.0     |
| Solid cancer                                          | 8 (15.1)                     | 11 (20.8)        | 0.613   |
| Chronic kidney disease                                | 4 (7.5)                      | 3 (5.7)          | 1.0     |
| Charlson Comorbidity Index, median (IQR)              | 2 (1-4.5)                    | 4 (1-6)          | 0.052   |
| SOFA score on admission, median (IQR)                 | 2 (1-3)                      | 2 (1-3)          | 0.95    |
| Vital signs on admission, n (%)                       |                              |                  |         |
| Systolic blood pressure < 90 mmHg                     | 5 (9.4)                      | 1 (1.9)          | 0.205   |
| Heart rate > 110 bpm                                  | 10 (18.9)                    | 6 (11.3)         | 0.416   |
| Respiratory rate > 22 bpm                             | 20 (37.7)                    | 12 (22.6)        | 0.138   |
| PaO <sub>2</sub> /FiO <sub>2</sub> ratio < 300        | 28 (52.8)                    | 34 (64.2)        | 0.324   |
| Laboratory findings on admission <sup>a</sup> , n (%) |                              |                  |         |
| Glucose > 140 mg/dL                                   | 15 (28.3)                    | 16 (30.2)        | 1.0     |
| Lymphopenia (L < 800/mcL)                             | 25 (47.2)                    | 19 (35.8)        | 0.324   |
| Thrombocytopenia (< 150 < 10 <sup>3</sup> /mcL)       | 16 (30.8)                    | 17 (32.1)        | 1.0     |
| Aspartate transaminase x 3 ULN                        | 0                            | 1 (1.9)          | 1.0     |
| Alanine transaminase, x 3 ULN                         | 2 (3.8)                      | 1 (1.9)          | 1.0     |
| Creatinine > 1.5 mg/dL                                | 4 (7.5)                      | 1 (1.9)          | 0.363   |
| D-dimer, mg/L, median (IQR)                           | 0.56 (0.26-1.03)             | 0.26 (0.18-0.63) | 0.811   |
| High sensitivity troponin T, ng/L, median (IQR)       | 22 (8-48)                    | 19 (10-42.5)     | 0.785   |
| Procalcitonin, ng/mL, median (IQR)                    | 0.13 (0.06-0.28)             | 0.08 (0.4-0.15)  | 0.686   |
| C-reactive protein, mg/dl, median (IQR)               | 6.42 (1.96-14.1)             | 6.41 (1.83-17.4) | 0.979   |
| Medications, n (%)                                    |                              |                  |         |
| Doxycycline                                           | 27 (50.9)                    | 31 (58.5)        | 0.559   |
| Macrolides                                            | 7 (13.2)                     | 5 (9.4)          | 0.761   |
| Remdesivir                                            | 3 (5.7)                      | 1 (1.9)          | 0.618   |
| Hydroxychloroquine                                    | 47 (88.7)                    | 44 (83)          | 0.579   |
| LMWH                                                  | 44 (83)                      | 50 (94.3)        | 0.123   |
| Steroids                                              | 23 (43.4)                    | 30 (56.6)        | 0.244   |
| Baricitinib                                           | 6 (11.3)                     | 7 (13.2)         | 1.0     |
| Tocilizumab                                           | 0                            | 0                | -       |
| Interventions                                         |                              |                  |         |
| Non-invasive mechanical ventilation, n (%)            | 9 (17)                       | 13 (24.5)        | 0.473   |

COPD: chronic obstructive pulmonary disease; LMWH: low-molecular weight heparin; IQR: interquartile ranges; LPV/r: lopinavir/ritonavir; DRV/r: darunavir/ritonavir; ULN upper limit of normality

**Supplementary Table 8.** Comparison of matched patients who received or not steroids

| Variable                                              | Steroids<br>N=115 | Controls<br>N=115 | p value |
|-------------------------------------------------------|-------------------|-------------------|---------|
| Age, years, median (IQR)                              | 73 (60-82)        | 71 (58-84)        | 0.982   |
| Male sex, n (%)                                       | 81 (70.4)         | 77 (67)           | 0.570   |
| Coexisting comorbidities, n (%)                       |                   |                   |         |
| COPD                                                  | 18 (15.7)         | 8 (7)             | 0.037   |
| Arterial hypertension                                 | 59 (51.3)         | 47 (40.9)         | 0.112   |
| Cardiovascular disease                                | 32 (27.8)         | 45 (39.1)         | 0.069   |
| Diabetes mellitus                                     | 27 (23.5)         | 35 (30.4)         | 0.235   |
| Cerebrovascular disease                               | 15 (13)           | 21 (18.3)         | 0.276   |
| Haemodialysis                                         | 0                 | 3 (2.6)           | 0.081   |
| Solid cancer                                          | 14 (12.2)         | 15 (13)           | 0.843   |
| Chronic kidney disease                                | 7 (6.1)           | 12 (10.4)         | 0.231   |
| Charlson Comorbidity Index, median (IQR)              | 3 (1-5)           | 3 (1-5)           | 0.702   |
| SOFA score on admission, median (IQR)                 | 2 (1-3)           | 2 (1-3)           | 0.823   |
| Vital signs on admission, n (%)                       |                   |                   |         |
| Systolic blood pressure < 90 mmHg                     | 6 (5.2)           | 5 (4.3)           | 0.757   |
| Heart rate > 110 bpm                                  | 16 (13.9)         | 12 (10.4)         | 0.420   |
| Respiratory rate > 22 bpm                             | 39 (33.9)         | 36 (31.5)         | 0.673   |
| PaO <sub>2</sub> /FiO <sub>2</sub> ratio < 300        | 71 (61.7)         | 72 (62.6)         | 0.892   |
| Laboratory findings on admission <sup>a</sup> , n (%) |                   |                   |         |
| Glucose > 140 mg/dL                                   | 36 (31.3)         | 37 (32.2)         | 0.887   |
| Lymphopenia (L < 800/mcL)                             | 59 (51.3)         | 46 (40)           | 0.085   |
| Thrombocytopenia (< 150 < 10 <sup>3</sup> /mcL)       | 40 (34.8)         | 42 (37.8)         | 0.633   |
| Aspartate transaminase x 3 ULN                        | 1 (0.9)           | 13 (11.3)         | 0.001   |
| Alanine transaminase, x 3 ULN                         | 1 (0.9)           | 7 (6.1)           | 0.031   |
| Creatinine > 1.5 mg/dL                                | 1 (0.9)           | 10 (8.7)          | 0.005   |
| D-dimer, mg/L, median (IQR)                           | 0.58 (0.35-0.87)  | 0.33 (0.21-0.63)  | 0.990   |
| High sensitivity troponin T, ng/L, median (IQR)       | 25 (10-41)        | 18 (9-89)         | 0.636   |
| Procalcitonin, ng/mL, median (IQR)                    | 0.14 (0.08-0.33)  | 0.09 (0.06-0.21)  | 0.063   |
| C-reactive protein, mg/dl, median (IQR)               | 7.8 (4.3-12.5)    | 5.4 (3.1-11.3)    | 0.229   |
| Medications, n (%)                                    |                   |                   |         |
| Doxycycline                                           | 57 (49.6)         | 68 (59.1)         | 0.145   |
| Macrolides                                            | 20 (17.4)         | 20 (17.4)         | 1.0     |
| Proteases inhibitors (LPV/r or DRV/r)                 | 68 (59.1)         | 63 (54.8)         | 0.506   |
| Remdesivir                                            | 0                 | 0                 | -       |
| Hydroxychloroquine                                    | 85 (73.9)         | 89 (77.4)         | 0.539   |
| LMWH                                                  | 97 (84.3)         | 101 (87.8)        | 0.446   |
| Baricitinib                                           | 16 (13.9)         | 26 (22.6)         | 0.088   |
| Tocilizumab                                           | 0                 | 2 (1.7)           | 0.155   |
| Interventions                                         |                   |                   |         |
| Non-invasive mechanical ventilation, n (%)            | 32 (27.8)         | 30 (26.1)         | 0.766   |

COPD: chronic obstructive pulmonary disease; LMWH: low-molecular weight heparin; IQR: interquartile ranges; LPV/r: lopinavir/ritonavir; DRV/r: darunavir/ritonavir; ULN upper limit of normality

**Supplementary Table 9.** Comparison of matched patients who received or not baricitinib

| Variable                                              | Baricitinib<br>N=21 | Controls<br>N=21 | p value |
|-------------------------------------------------------|---------------------|------------------|---------|
| Age, years, median (IQR)                              | 66 (54.5-73)        | 59 (43-74.5)     | 0.225   |
| Male sex, n (%)                                       | 15 (71.4)           | 15 (71.4)        | 1.0     |
| Coexisting comorbidities, n (%)                       |                     |                  |         |
| COPD                                                  | 0                   | 1 (4.8)          | 0.311   |
| Arterial hypertension                                 | 10 (47.6)           | 7 (33.3)         | 0.346   |
| Cardiovascular disease                                | 6 (28.6)            | 2 (9.5)          | 0.116   |
| Diabetes mellitus                                     | 3 (14.3)            | 4 (19)           | 0.679   |
| Cerebrovascular disease                               | 1 (4.8)             | 0                | 0.311   |
| Haemodialysis                                         | 0                   | 1 (4.8)          | 0.311   |
| Solid cancer                                          | 3 (14.3)            | 1 (4.8)          | 0.293   |
| Chronic kidney disease                                | 1 (4.8)             | 4 (19)           | 0.153   |
| Charlson Comorbidity Index, median (IQR)              | 3 (1-4.5)           | 1.6 (0-3.5)      | 0.255   |
| SOFA score on admission, median (IQR)                 | 3 (2-3)             | 2 (1-4)          | 0.578   |
| Vital signs on admission, n (%)                       |                     |                  |         |
| Systolic blood pressure < 90 mmHg                     | 1 (4.8)             | 2 (9.5)          | 0.549   |
| Heart rate > 110 bpm                                  | 5 (23.8)            | 4 (19)           | 0.707   |
| Respiratory rate > 22 bpm                             | 7 (33.3)            | 4 (19)           | 0.292   |
| PaO <sub>2</sub> /FiO <sub>2</sub> ratio < 300        | 17 (81)             | 11 (52.4)        | 0.050   |
| Laboratory findings on admission <sup>a</sup> , n (%) |                     |                  |         |
| Glucose > 140 mg/dL                                   | 2 (9.5)             | 4 (19)           | 0.378   |
| Lymphopenia (L < 800/mcL)                             | 8 (38.1)            | 9 (42.9)         | 0.753   |
| Thrombocytopenia (< 150 < 10 <sup>3</sup> /mcL)       | 10 (47.6)           | 6 (30)           | 0.248   |
| Aspartate transaminase x 3 ULN                        | 0                   | 0                | -       |
| Alanine transaminase, x 3 ULN                         | 0                   | 2 (9.5)          | 0.147   |
| Creatinine > 1.5 mg/dL                                | 0                   | 1 (4.8)          | 0.311   |
| D-dimer, mg/L, median (IQR)                           | 0.3 (0.2-0.52)      | 0.51 (0.26-1.33) | 0.543   |
| High sensitivity troponin T, ng/L, median (IQR)       | 15 (8-84.5)         | 10 (6-63.5)      | 0.840   |
| Procalcitonin, ng/mL, median (IQR)                    | 0.11 (0.06-0.3)     | 0.11 (0.06-0.4)  | 0.306   |
| C-reactive protein, mg/dl, median (IQR)               | 5.9 (3.4-13.1)      | 9.2 (4.5-16.1)   | 0.179   |
| Medications, n (%)                                    |                     |                  |         |
| Doxycycline                                           | 19 (90.5)           | 21 (100)         | 0.147   |
| Macrolides                                            | 2 (9.5)             | 5 (23.8)         | 0.214   |
| Proteases inhibitors (LPV/r or DRV/r)                 | 16 (76.2)           | 16 (76.2)        | 1.0     |
| Remdesivir                                            | 1 (4.8)             | 1 (4.8)          | 1.0     |
| Hydroxychloroquine                                    | 19 (90.5)           | 21 (100)         | 0.147   |
| Steroids                                              | 15 (71.4)           | 13 (61.9)        | 0.513   |
| LMWH                                                  | 20 (95.2)           | 21 (100)         | 0.311   |
| Tocilizumab                                           | 0                   | 0                | -       |
| Interventions                                         |                     |                  |         |
| Non-invasive mechanical ventilation, n (%)            | 12 (57.1)           | 3 (14.3)         | 0.004   |

COPD: chronic obstructive pulmonary disease; LMWH: low-molecular weight heparin; IQR: interquartile ranges; LPV/r: lopinavir/ritonavir; DRV/r: darunavir/ritonavir; ULN upper limit of normality
